# Supplementary material for: Adsorption of singlet and triplet oxygen on B-doped graphene: adsorption and electronic characteristics
Source: Royal Society of Chemistry journal article supplement (doi:10.1039/d3ra00624g), 2023-01-01
Supplement: d3ra00624g1.pdf [file d3ra00624g1.pdf]

## Supporting Information:

### Adsorption of singlet and triplet oxygen on B-doped graphene: Adsorption and electronic characteristics

A. Sahithi and K. Sumithra \*

Department of Chemistry, Birla Institute of Technology and Science, Pilani, Hyderabad Campus, 500078 Hyderabad, India.

\*Author to whom correspondence should be addressed.

Electronic mail: [sumithra@hyderabad.bits-pilani.ac.in](mailto:sumithra@hyderabad.bits-pilani.ac.in)

## Table of Contents

|      |                                                               |       |
|------|---------------------------------------------------------------|-------|
| I.   | Optimized structures and respective band structure .....      | S1-S2 |
| II.  | 5 × 5 supercell optimized geometry and band structures .....  | S3    |
| III. | Tables .....                                                  | S4-S5 |
| IV.  | Oxygen adsorption studies and respective band structures..... | S5-S7 |

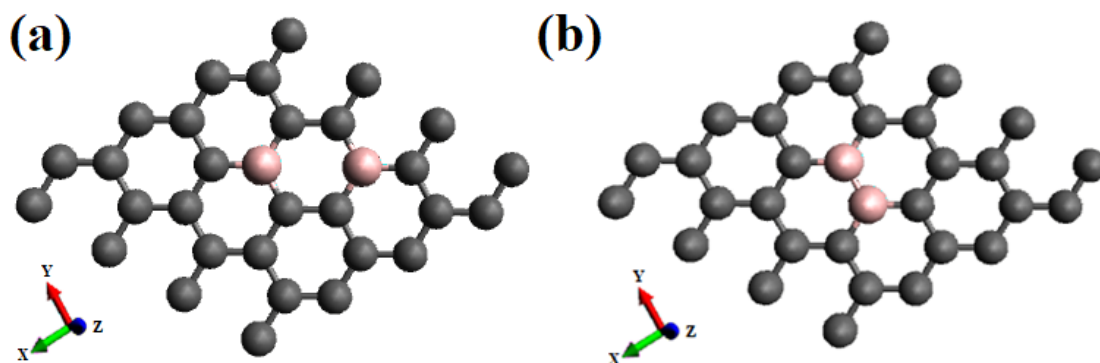

**Fig. S1** The 4 × 4 boron doped graphene supercell configurations with different concentrations of 6.25% boron, (a) and (b) denoted, as B2G-1 and B2G-3 respectively.

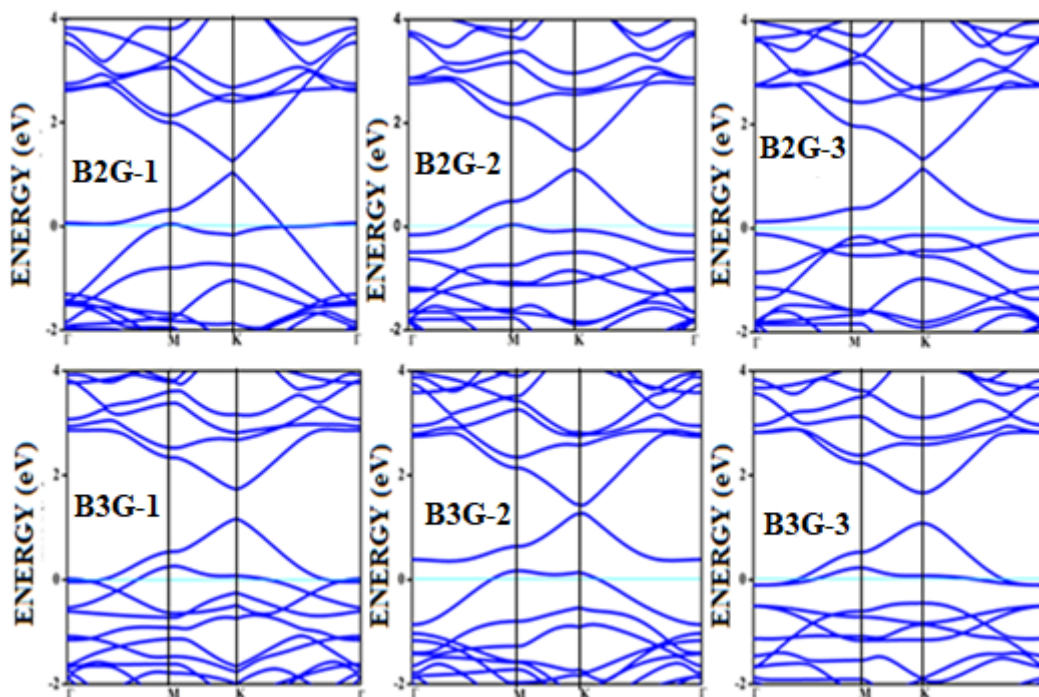

**Fig. S2** The band structures of borons doped graphene different patterns with different concentrations of doping shown in Fig. 1, in the manuscript and Fig. S1.

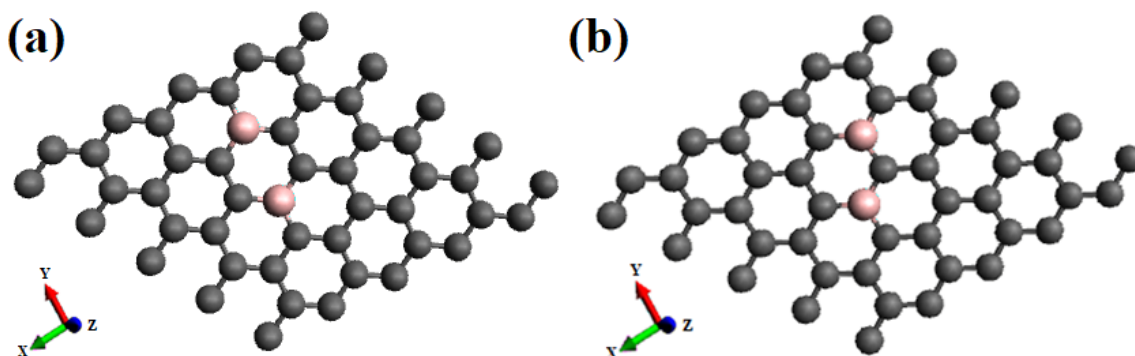

**Fig. S3** The optimized  $5 \times 5$  boron doped graphene supercell with concentration of 4% with different configurations from (a) and (b) denoted as B2G-1/ $5 \times 5$  and B2G-2/ $5 \times 5$ .

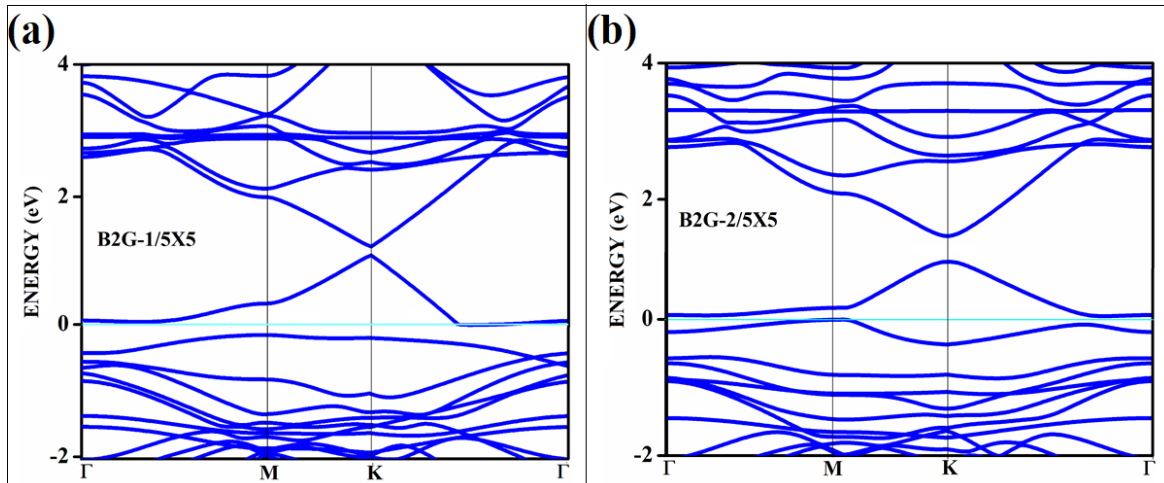

**Fig. S4** The band structures borons doped graphene supercell of configurations with doping percent of 4% as shown in Fig. S3.

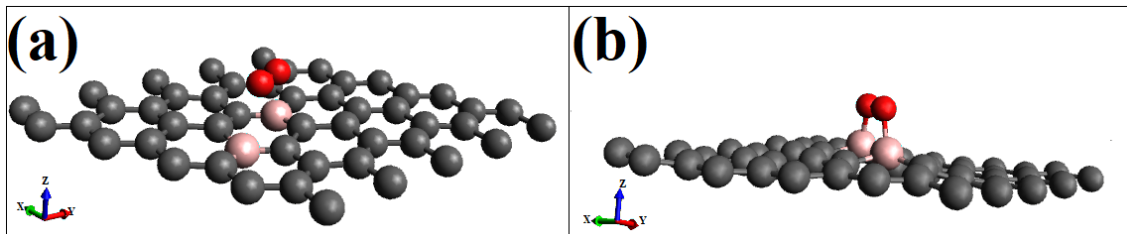

**Fig. S5** Shows the optimized geometries of respective singlet  $O_2$  adsorption on modified graphene surfaces (a)  $O_2(s)/B2G-1/5 \times 5$  (b)  $O_2(s)/B3G-2/5 \times 5$ .

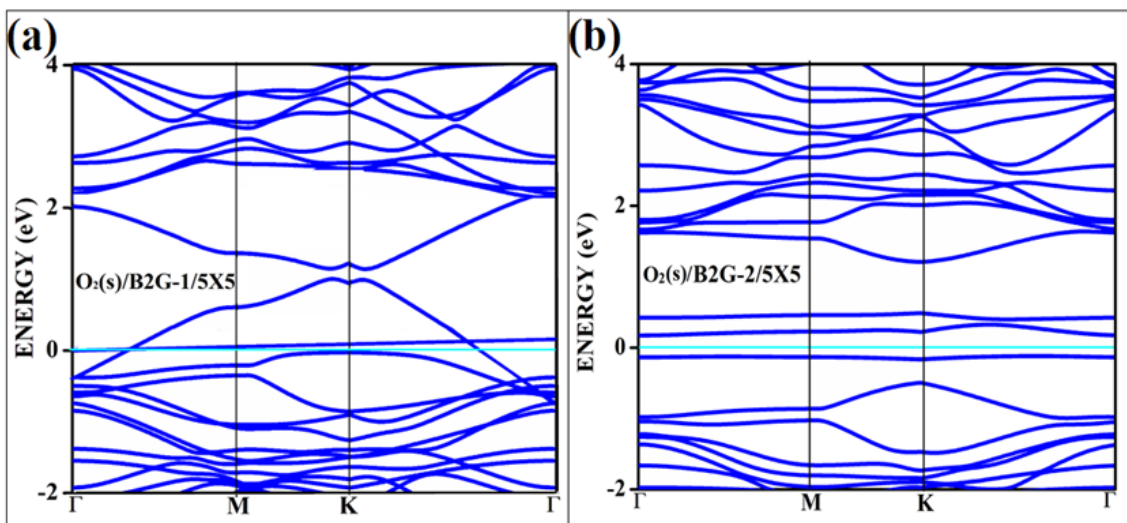

**Fig. S6** Shows the band structure of oxygen in singlet state adsorbed on surfaces (a)  $O_2(s)/B2G-1/5 \times 5$  (b)  $O_2(s)/B2G-2/5 \times 5$  ((s); singlet state of oxygen).

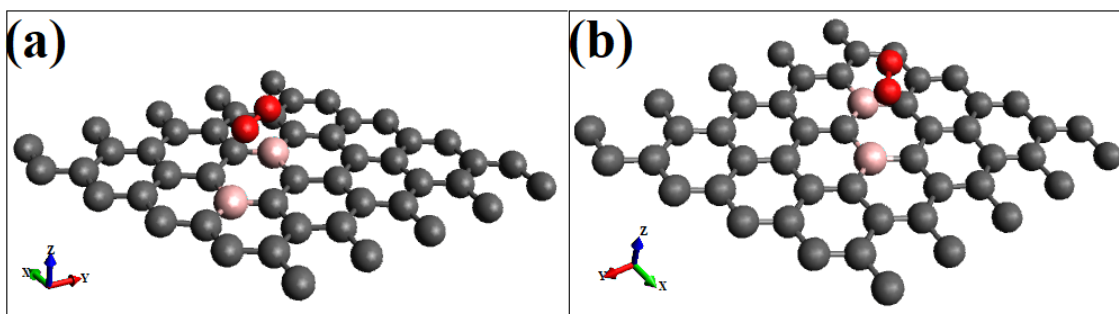

**Fig. S7** The optimized geometries of respective triplet  $O_2$  adsorption on modified graphene surfaces (a)  $O_2(t)/B2G-1/5 \times 5$  (b)  $O_2(t)/B3G-2/5 \times 5$ .

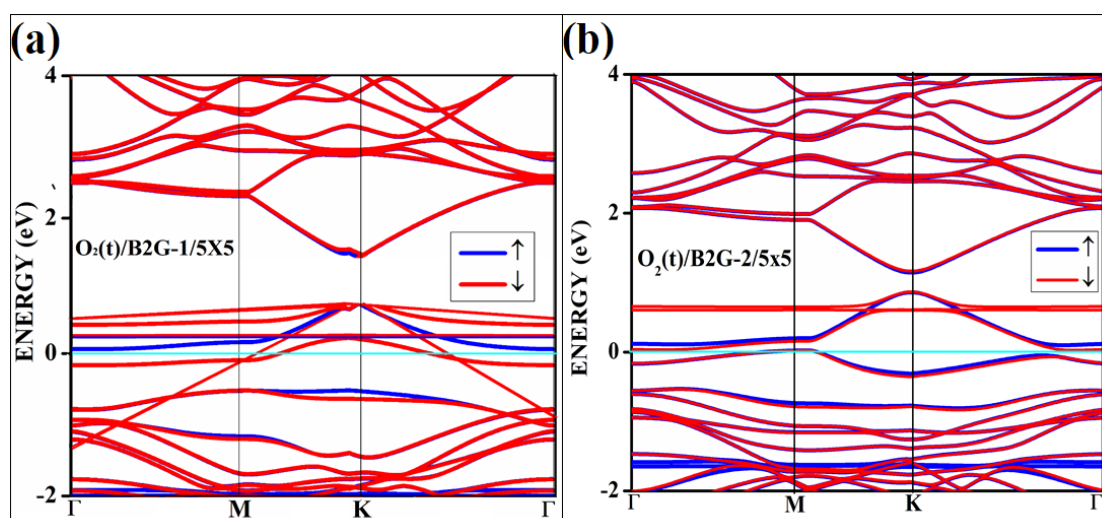

**Fig. S8** The band structure of oxygen in triplet state adsorbed on surfaces (a)  $O_2(t)/B2G-1/5 \times 5$  (b)  $O_2(t)/B2G-2/5 \times 5$  ((t); triplet state of oxygen).

**Table S1.** The adsorption energy, distance of adsorbate from the adsorbent, band gaps and the Bader charge transfers of oxygen in singlet state adsorption on  $5 \times 5$  supercell, 4% boron doped graphene were given respectively. Shown in parenthesis are the values obtained for 6.25% boron concentration on  $4 \times 4$  supercell.

| System<br>$^1\Delta_g$ on<br>$5 \times 5$ | Adsorption<br>energy (eV) | Distance ( $\text{\AA}$ ) | Charge<br>transfer (e) |
|-------------------------------------------|---------------------------|---------------------------|------------------------|
| B2G-1<br>(B-C-C-B)                        | -0.752 (-0.664)           | 2.0 (1.9)                 | 0.06(0.06)             |
| B2G-2<br>(B-C-B)                          | -1.152 (-1.222)           | 1.53 (1.53)               | 0.34 (0.32)            |

**Table S2.** The adsorption energy, distance of adsorbate from the adsorbent, band gaps and the Bader charge transfers of oxygen in triplet state adsorption on  $5 \times 5$  supercell boron doped graphene were given respectively.

| System<br>$^3\Sigma_g$ on<br>5x5 | Adsorption<br>energy (eV) | Distance ( $\text{\AA}$ ) | Band gap<br>(eV) | Charge<br>transfer (e) |
|----------------------------------|---------------------------|---------------------------|------------------|------------------------|
| B2G-1<br>(B-C-C-B)               | -0.154 (-0.144)           | 2.80 (2.86)               | -                | 0.02 (0.02)            |
| B2G-2<br>(B-C-B)                 | -0.146(-0.138)            | 2.85(2.9)                 | 0.39(0.41)       | 0.04(0.04)             |

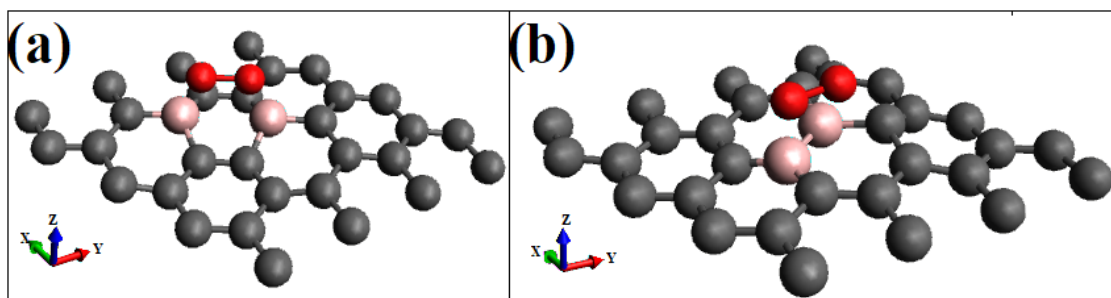

**Fig. S9** Shows the optimized geometries of respective singlet  $O_2$  adsorption on modified graphene surfaces (a)  $O_2(s)/B2G-1$  (b)  $O_2(s)/B3G-3$ .

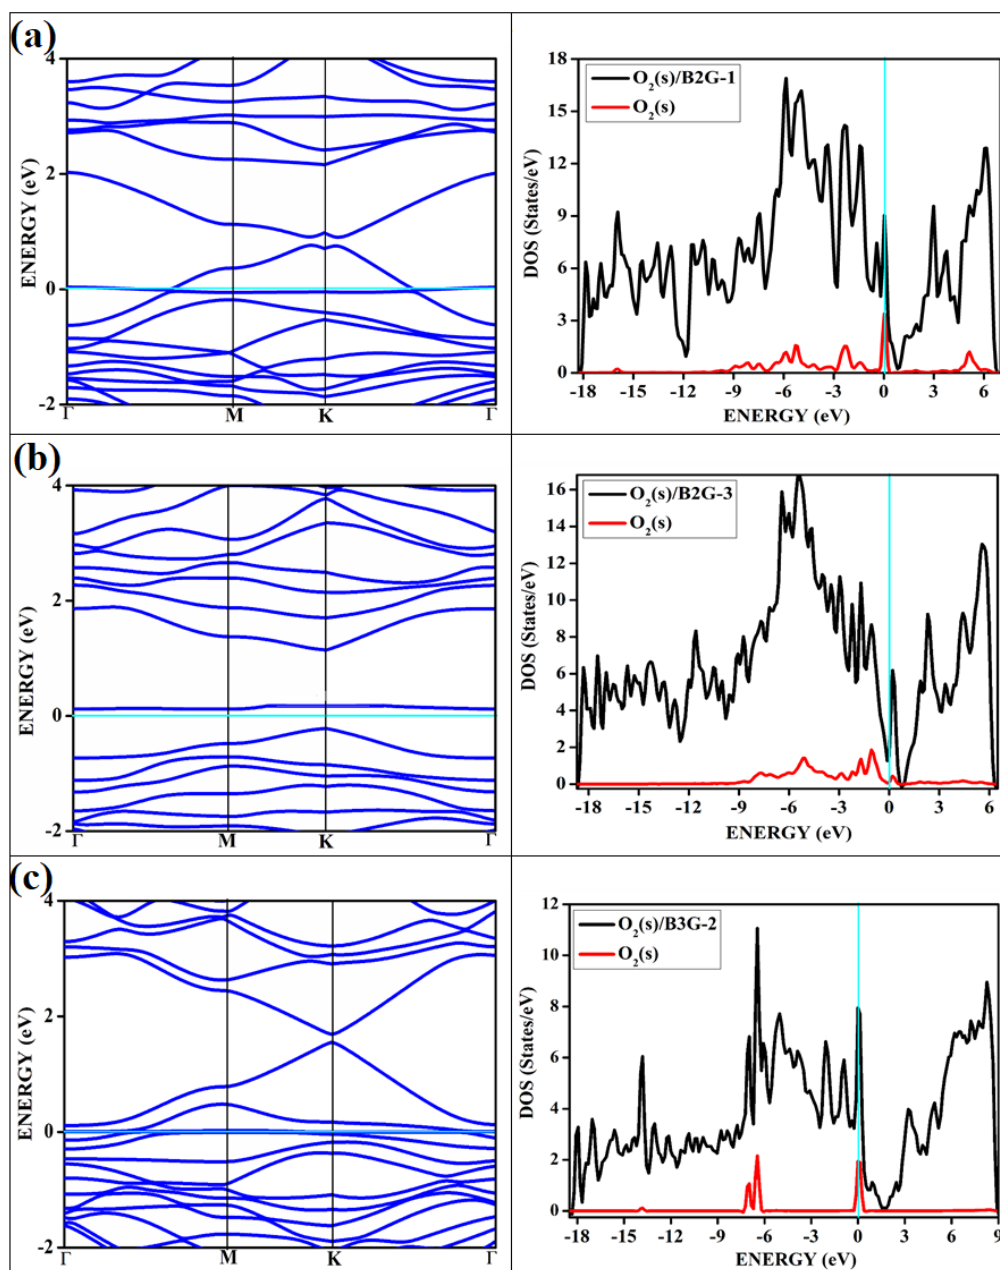

**Fig. S10** Shows the band structure and corresponding DOS of oxygen in singlet state adsorbed on surfaces (a)  $O_2(s)/B2G-1$  (b)  $O_2(s)/B2G-3$  (c)  $O_2(s)/B3G-2$  ((s); singlet state of oxygen). The magenta, red and blue represent the PDOS of carbon, oxygen and boron respectively.

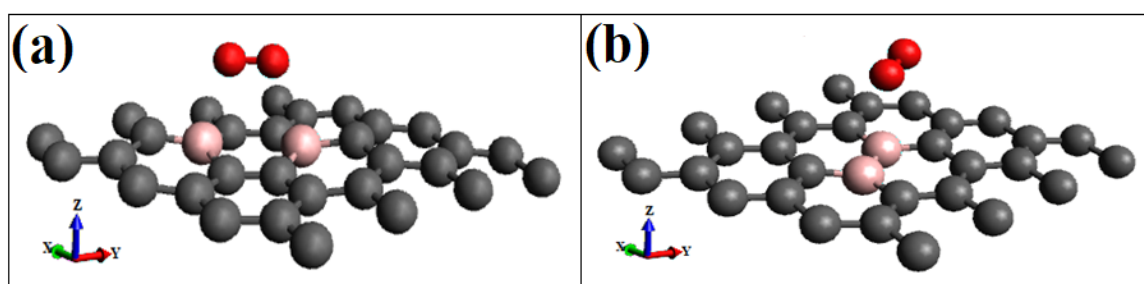

**Fig. S11** Shows the optimized geometries of respective triplet  $O_2$  adsorption on modified graphene surfaces (a)  $O_2(t)/B2G-1$  (b)  $O_2(t)/B3G-3$ .

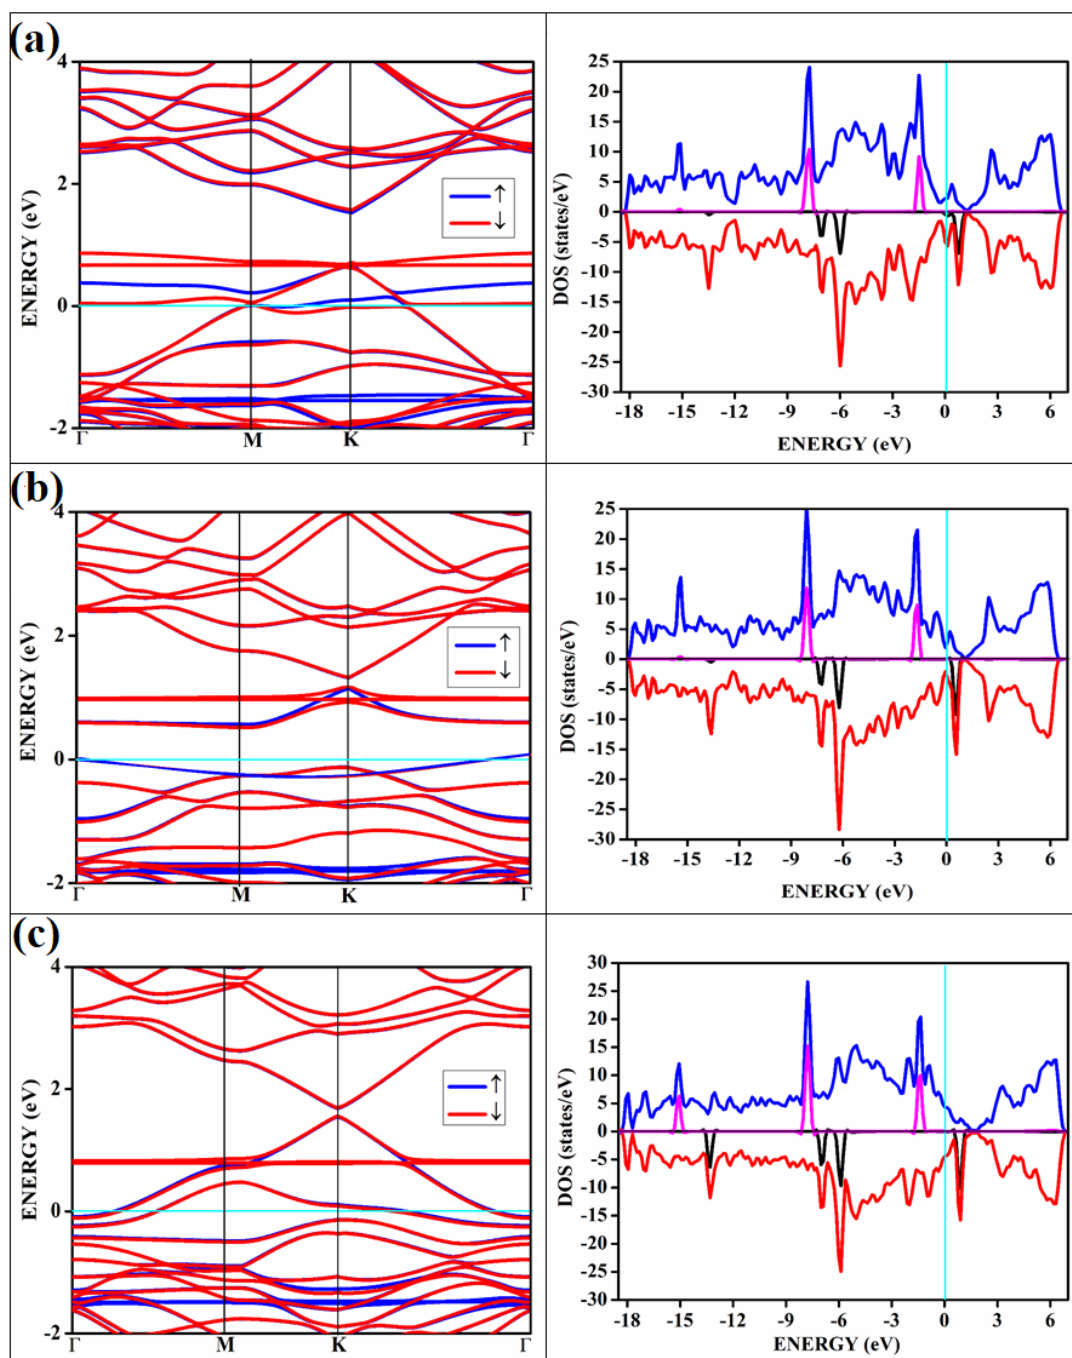

**Fig. S12** Shows the band structure and corresponding DOS of oxygen in triplet state adsorbed on surfaces (a)  $O_2(t)/B2G-1$  (b)  $O_2(t)/B2G-3$  (c)  $O_2(t)/B3G-2$  ((t); triplet state of oxygen). The magenta and black correspond to the PDOS of oxygen.
